# Supplementary material for: Comparative efficacy of different exercise interventions in patients with ankylosing spondylitis: a systematic review and network meta-analysis
Source: PeerJ. 2025 Nov 25;13:e20336. doi: 10.7717/peerj.20336 (PMC12662062; doi:10.7717/peerj.20336)
Supplement: Supplemental Information 2 [file peerj-13-20336-s002.xlsx]

## Sheet: Sheet1
Author/Year	id	types of exercise	mean	sd	n	Outcome measures	Intervention duration /week	Intervention T/C
Rube´n Ferna´ndez Garcı´a (2015)	1	5	-1.87	1.672	15	BASFI	8	Stretch
Rube´n Ferna´ndez Garcı´a (2015)	1	1	0.44	2.2192	15	BASFI	8	Conventional therapy
Fernández-de-Las-Peñas et al. (2007)	2	4	-2.31	1.4136	17	BASDAI	12	Running
Fernández-de-Las-Peñas et al. (2007)	2	1	-0.41	1.27	14	BASDAI	12	Conventional therapy
Fernández-de-Las-Peñas et al. (2007)	2	4	-0.42	1.456	17	BASMI	12	Running
Fernández-de-Las-Peñas et al. (2007)	2	1	-0.14	1.047	14	BASMI	12	Conventional therapy
Fernández-de-Las-Peñas et al. (2007)	2	4	-1.04	2.175	17	BASFI	12	Running
Fernández-de-Las-Peñas et al. (2007)	2	1	-0.47	2.482	14	BASFI	12	Conventional therapy
Ali Yavuz Karahan2016	3	4	-0.8	1.411	28	BASFI	8	Exergame
Ali Yavuz Karahan2014	3	1	0	1.652	29	BASFI	8	Conventional therapy
Ali Yavuz Karahan2016	3	4	-0.9	1.609	28	BASDAI	8	Exergame
Ali Yavuz Karahan2014	3	1	-0.1	2.1	29	BASDAI	8	Conventional therapy
Ali Yavuz Karahan2016	3	4	-2.7	5.4286	28	ASQoL	8	Exergame
Ali Yavuz Karahan2014	3	1	0.1	6.2097	29	ASQoL	8	Conventional therapy
Farzaneh Gandomi2022	4	2	-1.61	2.386	12	BASFI	6	Aqua Pilates
Farzaneh Gandomi2022	4	3	-1.47	1.996	14	BASFI	6	Aqua Stretch
Farzaneh Gandomi2022	4	1	0.15	2.4102	14	BASFI	6	routine drug treatment
Farzaneh Gandomi2022	4	2	-3.84	5.095	12	ASQoL	6	Aqua Pilates
Farzaneh Gandomi2022	4	3	-4.5	5.1101	14	ASQoL	6	Aqua Stretch
Farzaneh Gandomi2022	4	1	-1.93	6.71	14	ASQoL	6	routine drug treatment
Meliha Kasapoglu Aksoy2017	5	5	-0.78	1.4936	20	BASDAI	12	Stretch
Meliha Kasapoglu Aksoy2017	5	1	-0.19	1.9411	21	BASDAI	12	Conventional therapy
Meliha Kasapoglu Aksoy2017	5	5	-1.12	1.7806	20	BASFI	12	Stretch
Meliha Kasapoglu Aksoy2017	5	1	-0.05	2.317	21	BASFI	12	Conventional therapy
Meliha Kasapoglu Aksoy2017	5	5	-0.03	0.4204	20	BASMI	12	Stretch
Meliha Kasapoglu Aksoy2017	5	1	0	0.3604	21	BASMI	12	Conventional therapy
Jyoti Singh2023	6	5	-1.13	1.422	57	BASDAI	12	Yoga
Jyoti Singh2012	6	1	0.11	1.36	52	BASDAI	12	Conventional therapy
Jyoti Singh2023	6	5	-0.21	2.0904	57	BASFI	12	Yoga
Jyoti Singh2012	6	1	0.43	1.8107	52	BASFI	12	Conventional therapy
Jyoti Singh2023	6	5	-1.46	5.4009	57	ASQoL	12	Yoga
Jyoti Singh2012	6	1	0.97	5.1371	52	ASQoL	12	Conventional therapy
Marcelo Cardoso de Souza2016	7	5	-0.74	2.4276	27	BASFI	8	Swiss balls
Marcelo Cardoso de Souza2016	7	1	-0.1	2.4839	28	BASFI	8	Conventional therapy
Marcelo Cardoso de Souza2016	7	5	-1.26	2.3425	27	BASFI	16	Swiss balls
Marcelo Cardoso de Souza2016	7	1	-0.19	2.506	28	BASFI	16	Conventional therapy
Marcelo Cardoso de Souza2016	7	5	-0.04	1.985	27	BASMI	8	Swiss balls
Marcelo Cardoso de Souza2016	7	1	0.25	2.0918	28	BASMI	8	Conventional therapy
Marcelo Cardoso de Souza2016	7	5	-0.25	2.0192	27	BASMI	16	Swiss balls
Marcelo Cardoso de Souza2016	7	1	0.18	2.1245	28	BASMI	16	Conventional therapy
Marcelo Cardoso de Souza2016	7	5	-0.43	1.6304	27	BASDAI	8	Swiss balls
Marcelo Cardoso de Souza2016	7	1	-0.33	2.3277	28	BASDAI	8	Conventional therapy
Marcelo Cardoso de Souza2016	7	5	-0.44	1.7527	27	BASDAI	16	Swiss balls
Marcelo Cardoso de Souza2016	7	1	-0.22	2.3332	28	BASDAI	16	Conventional therapy
Li Ruqing2017	8	5	-3.6	2.211	54	BASDAI	4	Stretch
Li Ruqing2017	8	1	-1.1	2.931	40	BASDAI	4	Conventional therapy
Li Ruqing2017	8	5	-3.8	2.1656	54	BASDAI	8	Stretch
Li Ruqing2017	8	1	-1.7	2.5865	40	BASDAI	8	Conventional therapy
Li Ruqing2017	8	5	-4.4	2.1703	54	BASDAI	12	Stretch
Li Ruqing2017	8	1	-2.4	2.3	40	BASDAI	12	Conventional therapy
Li Ruqing2017	8	5	-1.6	7.302	54	BASFI	4	Stretch
Li Ruqing2017	8	1	-1.1	2.2068	40	BASFI	4	Conventional therapy
Li Ruqing2017	8	5	-2.6	6.5391	54	BASFI	8	Stretch
Li Ruqing2017	8	1	-1.1	2.0952	40	BASFI	8	Conventional therapy
Li Ruqing2017	8	5	-2.7	2.0809	54	BASFI	12	Stretch
Li Ruqing2017	8	1	-1.3	2.0224	40	BASFI	12	Conventional therapy
Chen Delin2014	9	6	-3.62	0.9403	43	BASDAI	8	Tai Chi
Chen Delin2014	9	1	-2.77	0.9959	43	BASDAI	8	Conventional therapy
Chen Delin2014	9	6	-1.81	1.6208	43	BASFI	8	Tai Chi
Chen Delin2014	9	1	-1.36	1.5748	43	BASFI	8	Conventional therapy
Qu Kun2020	10	6	-1.4	1.039	40	BASDAI	4	Tai Chi
Qu Kun2020	10	1	-1.34	1.187	40	BASDAI	4	Conventional therapy
Qu Kun2020	10	6	-2.5	0.908	40	BASDAI	8	Tai Chi
Qu Kun2020	10	1	-2.31	1.165	40	BASDAI	8	Conventional therapy
Qu Kun2020	10	6	-2.87	0.8675	40	BASDAI	12	Tai Chi
Qu Kun2020	10	1	-2.81	1.499	40	BASDAI	12	Conventional therapy
Qu Kun2020	10	6	-3.27	1.0272	40	BASDAI	16	Tai Chi
Qu Kun2020	10	1	-3.05	1.3182	40	BASDAI	16	Conventional therapy
Qu Kun2020	10	6	-3.42	1.1865	40	BASDAI	32	Tai Chi
Qu Kun2020	10	1	-3.22	1.2786	40	BASDAI	32	Conventional therapy
Qu Kun2020	10	6	-0.3	2.0493	40	BASFI	4	Tai Chi
Qu Kun2020	10	1	-0.66	1.6808	40	BASFI	4	Conventional therapy
Qu Kun2020	10	6	-1.49	2.1876	40	BASFI	8	Tai Chi
Qu Kun2020	10	1	-1.4	1.7141	40	BASFI	8	Conventional therapy
Qu Kun2020	10	6	-3.1	2.099	40	BASFI	12	Tai Chi
Qu Kun2020	10	1	-2.76	1.7162	40	BASFI	12	Conventional therapy
Qu Kun2020	10	6	-3.69	2.1065	40	BASFI	16	Tai Chi
Qu Kun2020	10	1	-2.97	1.6801	40	BASFI	16	Conventional therapy
Qu Kun2020	10	6	-4.09	2.1508	40	BASFI	32	Tai Chi
Qu Kun2020	10	1	-3.38	1.6831	40	BASFI	32	Conventional therapy
Qu Kun2020	10	6	-0.18	1.3313	40	BASMI	4	Tai Chi
Qu Kun2020	10	1	-0.08	1.5463	40	BASMI	4	Conventional therapy
Qu Kun2020	10	6	-0.29	1.0853	40	BASMI	8	Tai Chi
Qu Kun2020	10	1	-0.2	1.5532	40	BASMI	8	Conventional therapy
Qu Kun2020	10	6	-0.65	1.4252	40	BASMI	12	Tai Chi
Qu Kun2020	10	1	-0.43	1.1601	40	BASMI	12	Conventional therapy
Qu Kun2020	10	6	-1.43	0.9824	40	BASMI	16	Tai Chi
Qu Kun2020	10	1	-0.84	1.1471	40	BASMI	16	Conventional therapy
Qu Kun2020	10	6	-1.84	0.9527	40	BASMI	32	Tai Chi
Qu Kun2020	10	1	-1.26	1.305	40	BASMI	32	Conventional therapy
Basakci Calik（2018）	11	7	-0.95	2.22	16	BASDAI	8	Inspiratory muscle training+conventional exercises
Basakci Calik（2018）	11	4	-1.23	2.29	16	BASDAI	8	Conventional exercises
Basakci Calik（2018）	11	7	-0.29	1.61	16	BASFI	8	Inspiratory muscle training+conventional exercises
Basakci Calik（2018）	11	4	-0.51	1.42	16	BASFI	8	Conventional exercises
Basakci Calik（2018）	11	7	-0.56	1.15	16	BASMI	8	Inspiratory muscle training+
Basakci Calik（2018）	11	4	-0.5	1.09	16	BASMI	8	Conventional exercises
Demontis (2016)	12	4	-0.1159	1.8035	20	BASDAI	7	3 group) plus educational–behavioral therapy,
Demontis (2016)	12	1	-0.7915	1.9198	22	BASDAI	7	educational–behavioral therapy alone (educational groups).
Demontis (2016)	12	4	-0.3756	2.695	20	BASFI	7	supervised training and home-based rehabilitation program (rehabilitation group) plus educational–behavioral therapy,
Demontis (2016)	12	1	-1.2475	2.594	22	BASFI	7	educational–behavioral therapy alone (educational groups).
Demontis (2016)	12	4	-0.1	1.7553	20	BASMI	7	supervised training and home-based rehabilitation program (rehabilitation group) plus educational–behavioral therapy,
Demontis (2016)	12	1	-0.7923	1.4677	22	BASMI	7	educational–behavioral therapy alone (educational groups).
Demontis (2016)	12	4	-0.8878	1.8557	20	BASDAI	28	supervised training and home-based rehabilitation program (rehabilitation group) plus educational–behavioral therapy,
Demontis (2016)	12	1	-0.2	1.6376	22	BASDAI	28	educational–behavioral therapy alone (educational groups).
Demontis (2016)	12	4	-1.4439	1.4647	20	BASFI	28	supervised training and home-based rehabilitation program (rehabilitation group) plus educational–behavioral therapy,
Demontis (2016)	12	1	-0.3822	2.1309	22	BASFI	28	educational–behavioral therapy alone (educational groups).
Demontis (2016)	12	4	-1.4158	1.6659	20	BASMI	28	supervised training and home-based rehabilitation program (rehabilitation group) plus educational–behavioral therapy,
Demontis (2016)	12	1	0.077	1.8937	22	BASMI	28	educational–behavioral therapy alone (educational groups).
Dundar (2014)	13	2	-0.28	0.07	35	BASFI	4	aquatic exercise
Dundar (2014)	13	4	-0.3	0.09	34	BASFI	4	exercises (home-based exercise)
Dundar (2014)	13	2	-0.25	0.09	35	BASFI	12	aquatic exercise
Dundar (2014)	13	4	-0.27	0.13	34	BASFI	12	exercises (home-based exercise)
Dundar (2014)	13	2	-0.24	0.06	35	BASMI	4	aquatic exercise
Dundar (2014)	13	4	0.25	0.07	34	BASMI	4	exercises (home-based exercise)
Dundar (2014)	13	2	-0.22	0.07	35	BASMI	12	aquatic exercise
Dundar (2014)	13	4	-0.23	0.09	34	BASMI	12	exercises (home-based exercise)
Dundar (2014)	13	2	-0.33	0.11	35	BASDAI	4	aquatic exercise
Dundar (2014)	13	4	-0.3	0.12	34	BASDAI	4	exercises (home-based exercise)
Dundar (2014)	13	2	-0.3	0.1	35	BASDAI	12	aquatic exercise
Dundar (2014)	13	4	-0.3	0.12	34	BASDAI	12	exercises (home-based exercise)
Gunay(2018)	14	3	-1.4	1.2857	11	BASMI	3	conventional transcutaneous electrical nerve stimulation(TENS)+conventional exercises+balneotherapy+spa and land-based exercises
Gunay(2018)	14	4	-1.08	1.8267	10	BASMI	3	Conventional exercises+balneotherapy
Gunay(2018)	14	3	-1.1	1.139	11	BASFI	3	conventional transcutaneous electrical nerve stimulation(TENS)+conventional exercises+balneotherapy+spa and land-based exercises
Gunay(2018)	14	4	-1.23	2.4321	10	BASFI	3	Conventional exercises+balneotherapy
Gunay(2018)	14	3	-1.56	1.5497	11	BASDAI	3	TENS+conventional exercises+balneotherapy
Gunay(2018)	14	4	-1.4	2.2987	10	BASDAI	3	Conventional exercises+balneotherapy
Gunay(2018)	14	3	-2.28	2.3839	11	ASQoL	3	TENS+conventional exercises+balneotherapy
Gunay(2018)	14	4	-3.9	4.6642	10	ASQoL	3	Conventional exercises+balneotherapy
Gurcay (2008)	15	3	-2.2	1.39	29	BASDAI	3	Stager bath+conventional exercises
Gurcay (2008)	15	4	-0.59	0.71	28	BASDAI	3	Conventional exercises
Gurcay (2008)	15	3	-1.84	1.07	29	BASFI	3	Stager bath+conventional exercises
Gurcay (2008)	15	4	-0.48	0.73	28	BASFI	3	Conventional exercises
Gurcay (2008)	15	3	-0.74	0.89	29	BASMI	3	Stager bath+conventional exercises
Gurcay (2008)	15	4	-0.18	0.55	28	BASMI	3	Conventional exercises
Gurcay (2008)	15	3	-3.21	2.29	29	ASQoL	3	Stager bath+conventional exercises
Gurcay (2008)	15	4	-1.14	1.11	28	ASQoL	3	Conventional exercises
Karapolat (2008)	16	4	-0.89	2.1658	22	BASDAI	6	group exercises
Karapolat (2008)	16	5	-1.04	1.9843	16	BASDAI	6	home-based exercise
Karapolat (2008)	16	4	-0.57	2.0198	22	BASFI	6	group exercises
Karapolat (2008)	16	5	0	1.832	16	BASFI	6	home-based exercise
Karapolat (2008)	16	4	-0.59	2.295	22	BASMI	6	group exercises
Karapolat (2008)	16	5	-0.12	2.35	16	BASMI	6	home-based exercise
Kjeken (2013)	17	2	-14.2	47.817	46	BASDAI	16	Muscular reinforcement +endurance training
Kjeken (2013)	17	1	-4.9	52.222	49	BASDAI	48	No intervention
Kjeken (2013)	17	2	-6	47.817	46	BASFI	16	Muscular reinforcement +endurance training
Kjeken (2013)	17	1	-0.7	52.222	49	BASFI	48	No intervention
Lee (2008)	18	6	-7.38	13.02	13	BASDAI	8	Tai chi
Lee (2008)	18	1	0.35	6.77	17	BASDAI	8	No intervention
Levitova (2016)	19	6	-0.32	0.336	22	BASDAI	24	Supervised exercises
Levitova (2016)	19	1	0.01	0.1752	14	BASFI	24	No intervention
Levitova (2016)	19	6	-0.61	0.235	22	BASMI	24	Supervised exercises
Masiero (2011)	20	4	2.2921	1.9946	22	BASDAI	8	rehabilitation plus an educational-behavioral
Masiero (2011)	20	1	3.1306	2.536	23	BASDAI	8	control group
Masiero (2011)	20	4	1.9323	1.9946	22	BASDAI	24	rehabilitation plus an educational-behavioral
Masiero (2011)	20	1	3.323	2.6152	23	BASDAI	24	control group
Masiero (2011)	20	4	1.8518	1.5159	22	BASFI	8	rehabilitation plus an educational-behavioral
Masiero (2011)	20	1	2.667	1.9812	23	BASFI	8	control group
Masiero (2011)	20	4	1.2799	1.0372	22	BASFI	24	moderate-intensity Aerobic+ functional exercises
Masiero (2011)	20	1	2.7	2.0605	23	BASFI	24	control group
Masiero (2011)	20	4	3.664	1.6755	22	BASMI	8	moderate-intensity Aerobic+ functional exercises
Masiero (2011)	20	1	4.0947	1.8227	23	BASMI	8	control group
Masiero (2011)	20	4	3.1	1.117	20	BASMI	24	moderate-intensity Aerobic+ functional exercises
Wang (2022)	21	4	-0.9	1.9806	26	BASDAI	8	moderate-intensity Aerobic+ functional exercises
Wang (2022)	21	1	-0.4	1.96	28	BASDAI	8	Usual care
Wang (2022)	21	4	-1.1	1.9806	26	BASDAI	16	moderate-intensity Aerobic+ functional exercises
Wang (2022)	21	1	-0.7	2.063	28	BASDAI	16	Usual care
Wang (2022)	21	4	-0.4	1.93	26	BASFI	8	moderate-intensity Aerobic+ functional exercises
Wang (2022)	21	1	-0.1	1.8052	28	BASFI	8	Usual care
Wang (2022)	21	4	-0.7	1.9806	26	BASFI	16	moderate-intensity Aerobic+ functional exercises
Wang (2022)	21	1	-0.3	1.4958	28	BASFI	16	Usual care
Wang (2022)	21	4	-0.5	1.4855	26	BASMI	8	moderate-intensity Aerobic+ functional exercises
Wang (2022)	21	1	-0.04	1.5474	28	BASMI	8	Usual care
Wang (2022)	21	4	-0.5	1.4855	26	BASMI	16	moderate-intensity Aerobic+ functional exercises
Wang (2022)	21	1	0.2	1.8052	28	BASMI	16	Usual care
Min Wok So (2012)	22	4	-1.13	3.09	23	BASDAI	16	Inspiratory muscle training+ conventional exercises
Min Wok So (2012)	22	1	-0.13	1.32	23	BASDAI	16	Conventional exercises
Min Wok So (2012)	22	4	-1.04	1.98	23	BASFI	16	Inspiratory muscle training+ conventional exercises
Min Wok So (2012)	22	1	-0.57	2.01	23	BASFI	16	Conventional exercises
Altan (2012)	23	5	-0.4	0.7	30	BASMI	12	Pilates
Altan (2012)	23	1	-0.2	0.8	25	BASMI	12	No intervention
Altan (2012)	23	5	-0.4	0.8	30	BASMI	24	Pilates
Altan (2012)	23	1	0.2	1.1	25	BASMI	24	No intervention
Altan (2012)	23	5	-0.7	1.8	30	BASDAI	12	Pilates
Altan (2012)	23	1	0.5	1.1	25	BASDAI	12	No intervention
Altan (2012)	23	5	-0.4	2.1	30	BASDAI	24	Pilates
Altan (2012)	23	1	0.4	0.9	25	BASDAI	24	No intervention
Altan (2012)	23	5	-0.7	1.5	30	BASFI	12	Pilates
Altan (2012)	23	1	0.1	0.9	25	BASFI	12	No intervention
Altan (2012)	23	5	-0.7	1.2	30	BASFI	24	Pilates
Altan (2012)	23	1	0.1	1.1	25	BASFI	24	No intervention
Altan (2012)	23	5	0.3	2.9	30	ASQoL	12	Pilates
Altan (2012)	23	1	-0.2	1.5	25	ASQoL	12	No intervention
Altan (2012)	23	5	0.1	3.4	30	ASQoL	24	Pilates
Altan (2012)	23	1	-0.4	1.7	25	ASQoL	24	No intervention
Analay (2003)	24	4	-6.34	18.6556	23	BASFI	6	Aerobic
Analay (2003)	24	5	-0.28	19.2521	22	BASFI	6	Home self-exercises+educational therapy
Analay (2003)	24	4	-4.34	18.7994	23	BASFI	12	Aerobic
Analay (2003)	24	5	-1.46	17.5182	22	BASFI	12	Home self-exercises+educational therapy
Aytekin (2012)	25	4	-0.49	2.2025	34	BASFI	12	Home self-exercise（range of motion, stretching, strengthening, posture, and respiratory exercises）
Aytekin (2012)	25	1	0.09	2.2803	32	BASFI	12	No intervention
Aytekin (2012)	25	4	-0.67	2.0265	34	BASDAI	12	Home self-exercise（range of motion, stretching, strengthening, posture, and respiratory exercises）
Aytekin (2012)	25	1	0.09	2.2	32	BASDAI	12	No intervention
Aytekin (2012)	25	4	-2.27	4.9334	34	ASQoL	12	Home self-exercise（range of motion, stretching, strengthening, posture, and respiratory exercises）
Aytekin (2012)	25	1	0.62	6.0361	32	ASQoL	12	No intervention
Basakci Calik (2021)	26	4	-2.31	1.4709	17	BASDAI	12	Aerobic+supervised mobility exercises
Basakci Calik (2021)	26	5	-0.41	1.9346	14	BASDAI	12	Supervised mobility exercises
Basakci Calik (2021)	26	4	-1.41	1.7152	17	BASDAI	24	Aerobic+supervised mobility exercises
Basakci Calik (2021)	26	5	0.86	1.9738	14	BASDAI	24	Supervised mobility exercises
Basakci Calik (2021)	26	4	-0.42	1.4563	17	BASFI	12	Aerobic+supervised mobility exercises
Basakci Calik (2021)	26	5	-0.14	1.0468	14	BASFI	12	Supervised mobility exercises
Basakci Calik (2021)	26	4	-0.41	1.5209	17	BASFI	24	Aerobic+supervised mobility exercises
Basakci Calik (2021)	26	5	-0.48	0.9544	14	BASFI	24	Supervised mobility exercises
Basakci Calik (2021)	26	4	-1.04	2.1748	17	BASMI	12	Aerobic+supervised mobility exercises
Basakci Calik (2021)	26	5	-0.47	2.4815	14	BASMI	12	Supervised mobility exercises
Basakci Calik (2021)	26	4	-0.86	2.2165	17	BASMI	24	Aerobic+supervised mobility exercises
Basakci Calik (2021)	26	5	1.24	2.2823	14	BASMI	24	Supervised mobility exercises
Ciprian (2011)	27	3	-1.55	2.9718	15	BASMI	2	spa therapy（mud packs and thermal baths）+rehabilitation (exercises in a thermal pool)+anti-TNF agents
Ciprian (2011)	27	1	-0.23	1.3077	15	BASMI	2	receiving anti-TNF agents
Ciprian (2011)	27	3	-1.3	2.8064	15	BASMI	12	spa therapy（mud packs and thermal baths）+rehabilitation (exercises in a thermal pool)+anti-TNF agents
Ciprian (2011)	27	1	0.1	1.5465	15	BASMI	12	receiving anti-TNF agents
Ciprian (2011)	27	3	-1.13	3.097	15	BASMI	24	spa therapy（mud packs and thermal baths）+rehabilitation (exercises in a thermal pool)+anti-TNF agents
Ciprian (2011)	27	1	-0.13	1.3273	15	BASMI	24	receiving anti-TNF agents
Ciprian (2011)	27	3	-0.85	1.1407	15	BASDAI	2	spa therapy（mud packs and thermal baths）+rehabilitation (exercises in a thermal pool)+anti-TNF agents
Ciprian (2011)	27	1	-0.66	1.5837	15	BASDAI	2	receiving anti-TNF agents
Ciprian (2011)	27	3	-0.56	1.3436	15	BASDAI	12	spa therapy（mud packs and thermal baths）+rehabilitation (exercises in a thermal pool)+anti-TNF agents
Ciprian (2011)	27	1	-0.2	1.7214	15	BASDAI	12	receiving anti-TNF agents
Ciprian (2011)	27	3	-0.48	1.2005	15	BASDAI	24	spa therapy（mud packs and thermal baths）+rehabilitation (exercises in a thermal pool)+anti-TNF agents
Ciprian (2011)	27	1	-0.46	1.6493	15	BASDAI	24	receiving anti-TNF agents
Günendi (2010)	28	4	0.9	2.4397	16	BASDAI	3	Aerobic training+Home selfexercises (stretch and reinforcement)
Günendi (2010)	28	5	-0.5	3.5656	16	BASDAI	3	Home self-exercises (stretch and reinforcement)
Günendi (2010)	28	4	1.1	2.4397	16	BASFI	3	Aerobic training+Home selfexercises (stretch and reinforcement)
Günendi (2010)	28	5	-0.5	3.1903	16	BASFI	3	Home self-exercises (stretch and reinforcement)
Hsieh (2014)	29	4	-1.8	2.9309	9	BASFI	13	Aerobic training+muscular reinforcement+range-ofmotion home exercisesHEP
Hsieh (2014)	29	5	0	3.005	10	BASFI	13	Range-of-motion home exercises
Hsieh (2014)	29	4	-0.5	1.852	9	BASDAI	13	Aerobic training+muscular reinforcement+range-ofmotion home exercisesHEP
Hsieh (2014)	29	5	0	2.6665	10	BASDAI	13	Range-of-motion home exercises
Jennings (2015)	30	4	-0.79	2.6812	35	BASFI	6	50 min of walking+stretching exercises
Jennings (2015)	30	5	-0.31	2.2015	35	BASFI	6	stretching exercises
Jennings (2015)	30	4	-0.91	2.6469	35	BASFI	12	50 min of walking+stretching exercises
Jennings (2015)	30	5	-0.25	2.065	35	BASFI	12	stretching exercises
Jennings (2015)	30	4	-0.81	2.6428	35	BASFI	24	50 min of walking+stretching exercises
Jennings (2015)	30	5	-0.54	2.2578	35	BASFI	24	stretching exercises
Jennings (2015)	30	4	-0.22	1.9652	35	BASMI	6	50 min of walking+stretching exercises
Jennings (2015)	30	5	-0.19	2.22	35	BASMI	6	stretching exercises
Jennings (2015)	30	4	-0.22	1.945	35	BASMI	12	50 min of walking+stretching exercises
Jennings (2015)	30	5	-0.14	2.1811	35	BASMI	12	stretching exercises
Jennings (2015)	30	4	-0.2	1.9912	35	BASMI	24	50 min of walking+stretching exercises
Jennings (2015)	30	5	-0.18	2.2301	35	BASMI	24	stretching exercises
Jennings (2015)	30	4	-0.61	2.3009	35	BASDAI	6	50 min of walking+stretching exercises
Jennings (2015)	30	5	-0.52	2.0307	35	BASDAI	6	stretching exercises
Jennings (2015)	30	4	-0.71	2.2671	35	BASDAI	12	50 min of walking+stretching exercises
Jennings (2015)	30	5	-0.83	2.0259	35	BASDAI	12	stretching exercises
Jennings (2015)	30	4	-0.59	2.2101	35	BASDAI	24	50 min of walking+stretching exercises
Jennings (2015)	30	5	-0.35	2.065	35	BASDAI	24	stretching exercises
Karahan (2017)	31	4	-0.8	1.4107	28	BASFI	8	Home self-exercises (video-games)
Karahan (2017)	31	1	0	1.6523	29	BASFI	8	No intervention
Karahan (2017)	31	4	-0.9	1.6093	28	BASDAI	8	Home self-exercises (video-games)
Karahan (2017)	31	1	-0.1	2.1	29	BASDAI	8	No intervention
Karahan (2017)	31	4	-2.7	5.4286	28	ASQoL	8	Home self-exercises (video-games)
Karahan (2017)	31	1	0.1	6.2097	29	ASQoL	8	No intervention
Karapolat (2009)	32	2	-0.61	2.1769	13	BASMI	6	Swimming+conventional exercises
Karapolat (2009)	32	4	-0.36	2.8075	12	BASMI	6	walking exercise +conventional exercises
Karapolat (2009)	32	5	-0.08	3.3435	12	BASMI	6	Conventional exercises
Karapolat (2009)	32	2	-0.83	1.7916	13	BASDAI	6	Swimming+conventional exercises
Karapolat (2009)	32	4	0.19	1.9848	12	BASDAI	6	walking exercise +conventional exercises
Karapolat (2009)	32	5	-0.62	2.0087	12	BASDAI	6	Conventional exercises
Karapolat (2009)	32	2	-0.37	1.523	13	BASFI	6	Swimming+conventional exercises
Karapolat (2009)	32	4	0	2.0984	12	BASFI	6	walking exercise +conventional exercises
Karapolat (2009)	32	5	0.43	2.5875	12	BASFI	6	Conventional exercises
Kasapoglu Aksoy (2017)	33	5	-0.78	1.4936	20	BASDAI	13	Home self-exercises
Kasapoglu Aksoy (2017)	33	1	-0.19	1.9411	21	BASDAI	13	No intervention
Kasapoglu Aksoy (2017)	33	5	-1.12	1.7806	20	BASFI	13	Home self-exercises
Kasapoglu Aksoy (2017)	33	1	-0.05	2.317	21	BASFI	13	No intervention
Kasapoglu Aksoy (2017)	33	5	-0.03	0.4204	20	BASMI	13	Home self-exercises
Kasapoglu Aksoy (2017)	33	1	0	0.3604	21	BASMI	13	No intervention
Kasapoglu Aksoy (2017)	33	5	-0.3	3.9661	20	ASQoL	13	Home self-exercises
Kasapoglu Aksoy (2017)	33	1	-0.2	5.5	21	ASQoL	13	No intervention
Masiero (2014)	34	5	-0.9	1.2767	21	BASMI	48	Supervised exercises followed by self-exercises
Masiero (2014)	34	1	0.1	1.4731	21	BASMI	48	No intervention
Masiero (2014)	34	5	-0.8	1.4107	21	BASFI	48	Supervised exercises followed by self-exercises
Masiero (2014)	34	1	0.1	1.8682	21	BASFI	48	No intervention
Masiero (2014)	34	5	-1.6	1.4731	21	BASDAI	48	Supervised exercises followed by self-exercises
Masiero (2014)	34	1	0.1	1.9975	21	BASDAI	48	No intervention
Niedermann (2013)	35	4	-0.46	1.83	53	BASDAI	48	Aerobic training
Niedermann (2013)	35	1	-0.46	1.92	53	BASDAI	48	Educational therapy
Niedermann (2013)	35	4	0.13	1.745	53	BASFI	48	Aerobic training
Niedermann (2013)	35	1	0	1.867	53	BASFI	48	Educational therapy
Niedermann (2013)	35	4	-0.5	2.07	53	BASMI	48	Aerobic training
Niedermann (2013)	35	1	-0.14	1.974	53	BASMI	48	Educational therapy
Rodriguez-Loano(2013)	36	5	-0.65	1.7428	381	BASDAI	24	Home self-exercises
Rodriguez-Loano(2013)	36	1	-0.37	2.7575	375	BASDAI	24	No intervention
Rodriguez-Loano(2013)	36	5	-0.54	2.7796	381	BASFI	24	Home self-exercises
Rodriguez-Loano(2013)	36	1	-0.21	3.4764	375	BASFI	24	No intervention
Rodriguez-Loano(2013)	36	5	-0.98	6.0556	381	ASQOL	24	Home self-exercises
Rodriguez-Loano(2013)	36	1	-0.23	6.0074	375	ASQOL	24	No intervention
Rosu (2014)	37	4	-3.31	1.696	48	BASDAI	48	Pilates, McKenzie and HeckscherMcKenzie training (postural education, back stretching, pelvic stabilization and respiratory exercise) (50 min), 3 ×/week (6 months − 3 months super- vised + 3 months HEP)
Rosu (2014)	37	5	-1.16	1.829	48	BASDAI	48	Conventional exercises
Rosu (2014)	37	4	-2.06	1.597	48	BASFI	48	Pilates, McKenzie and Heckscher
Rosu (2014)	37	5	-0.66	1.781	48	BASFI	48	Conventional exercises
Rosu (2014)	37	4	-2.54	0.728	48	BASMI	48	Pilates, McKenzie and Heckscher
Rosu (2014)	37	5	-0.28	0.445	48	BASMI	48	Conventional exercises
Rosu (2015)	38	4	-3.45	1.646	48	BASDAI	48	Pilates, McKenzie and HeckscherMcKenzie training (postural education, back stretching, pelvic stabilization and respiratory exercise) (50 min), 3 ×/week (6 months − 3 months super- vised + 3 months HEP)
Rosu (2015)	38	5	-1.14	1.529	48	BASDAI	48	Conventional exercises
Rosu (2015)	38	4	-2.16	1.697	48	BASFI	48	Pilates, McKenzie and Heckscher
Rosu (2015)	38	5	-0.16	1.581	48	BASFI	48	Conventional exercises
Rosu (2015)	38	4	-2.55	0.738	48	BASMI	48	Pilates, McKenzie and Heckscher
Rosu (2015)	38	5	-0.38	0.455	48	BASMI	48	Conventional exercises
Silva (2012)	39	4	-3.5	0.459	20	BASDAI	16	Global postural rehabilitation
Silva (2012)	39	5	-2.1	0.271	15	BASDAI	16	Conventional exercises
Sveaas (2014)	40	7	-2	1.778	10	BASDAI	12	Aerobic training (HiiT)+ muscular reinforcementGEP
Sveaas (2014)	40	1	-0.1	1.758	14	BASDAI	12	No intervention
Sveaas (2014)	40	7	-1.1	1.948	10	BASFI	12	Aerobic training (HiiT)+ muscular reinforcementGEP
Sveaas (2014)	40	1	0	1.51	14	BASFI	12	No intervention
Sveaas (2014)	40	7	-0.3	1.552	10	BASMI	12	Aerobic training (HiiT)+ muscular reinforcementGEP
Sveaas (2014)	40	1	-0.1	1.8	14	BASMI	12	No intervention
Souza (2016)	41	5	-0.74	2.428	27	BASFI	8	Swiss ball exercises
Souza (2016)	41	1	-0.1	2.484	28	BASFI	8	No intervention
Souza (2016)	41	5	-1.26	2.342	27	BASFI	16	Swiss ball exercises
Souza (2016)	41	1	-0.19	2.506	28	BASFI	16	No intervention
Souza (2016)	41	5	-0.04	1.985	27	BASMI	8	Swiss ball exercises
Souza (2016)	41	1	0.25	2.092	28	BASMI	8	No intervention
Souza (2016)	41	5	-0.25	2.019	27	BASMI	16	Swiss ball exercises
Souza (2016)	41	1	0.18	2.125	28	BASMI	16	No intervention
Souza (2016)	41	5	-0.43	1.63	27	BASDAI	8	Swiss ball exercises
Souza (2016)	41	1	-0.33	2.33	28	BASDAI	8	No intervention
Souza (2016)	41	5	-0.44	1.74	27	BASDAI	16	Swiss ball exercises
Souza (2016)	41	1	-0.22	2.33	28	BASDAI	16	No intervention
Sveaas (2020)	42	4	-2	1.78	50	BASDAI	12	Aerobic training (HiiT)+muscular reinforcement
Sveaas (2020)	42	1	-0.1	1.76	50	BASDAI	12	No intervention
Sveaas (2020)	42	4	-1.1	1.95	50	BASFI	12	Aerobic training (HiiT)+muscular reinforcement
Sveaas (2020)	42	1	0	1.51	50	BASFI	12	No intervention
Sveaas (2020)	42	4	-0.3	1.55	50	BASMI	12	Aerobic training (HiiT)+muscular reinforcement
Sveaas (2020)	42	1	-0.1	1.8	50	BASMI	12	No intervention
Sweeney (2002)	43	5	-0.43	1.78	100	BASFI	24	Home self-exercises
Sweeney (2002)	43	1	-0.23	1.89	100	BASFI	24	No intervention
Sweeney (2002)	43	5	-0.33	1.87	100	BASDAI	24	Home self-exercises
Sweeney (2002)	43	1	-0.58	0.58	100	BASDAI	24	No intervention
Xie (2019)	44	6	-0.59	1.09	23	BASDAI	12	Baduajin Qigong
Xie (2019)	44	1	-0.15	1.17	23	BASDAI	12	No intervention
Xie (2019)	44	6	-0.12	1.06	23	BASFI	12	Baduajin Qigong
Xie (2019)	44	1	0.12	1.06	23	BASFI	12	No intervention
Xie (2019)	44	6	-0.13	1.32	23	BASMI	12	Baduajin Qigong
Xie (2019)	44	1	2.13	1.12	23	BASMI	12	No intervention
Acharya et al.(2024)	45	4	-0.3	1.45	15	BASMI	8	Yoga
Acharya et al.(2024)	45	5	-0.4	1.44	18	BASMI	8	exercise
Acharya et al.(2024)	45	4	-0.5	1.45	15	BASMI	12	Yoga
Acharya et al.(2024)	45	5	-0.4	1.46	18	BASMI	12	exercise
Acharya et al.(2024)	45	4	-0.3	2.08	15	BASFI	8	Yoga
Acharya et al.(2024)	45	5	-0.6	1.92	18	BASFI	8	exercise
Acharya et al.(2024)	45	4	-0.5	2.13	15	BASFI	12	Yoga
Acharya et al.(2024)	45	5	-1	1.93	18	BASFI	12	exercise
Cagliyan et al. (2007)	46	7	-0.23	-0.06	23	BASFI	16	incentive spirometer exercise+Conventional exercises
Cagliyan et al. (2007)	46	5	-0.46	-0.17	23	BASFI	16	Conventional exercises
Cagliyan et al. (2007)	46	7	-0.4	0.45	23	BASDAI	16	incentive spirometer exercise+Conventional exercises
Cagliyan et al. (2007)	46	5	-0.17	0.5	23	BASDAI	16	Conventional exercises
Durmus et al.(2008)	47	7	-0.97	-0.46	25	BASFI	12	home-based exercise，Xexibility
Durmus et al.(2008)	47	1	-0.25	-0.08	18	BASFI	12	medical therapy
Durmus et al.(2008)	47	7	-1.17	-0.47	25	BASDAI	12	home-based exercise，Xexibility，
Durmus et al.(2008)	47	1	-0.29	-0.06	18	BASDAI	12	medical therapy
Widberg et al.(2009)	48	7	-0.5	0.5	16	BASDAI	8	HEP (mobility exercises, stretching and relaxation exercises) (60 min) 2 ×/ day (8 weeks)
Widberg et al.(2009)	48	1	-0.5	-0.1	16	BASDAI	8	HEP (mobility exercises, stretching and relaxation exercises) (60 min) 2 ×/ day (9 weeks)
Widberg et al.(2009)	48	7	-0.7	0.1	16	BASFI	8	HEP (mobility exercises, stretching and relaxation exercises) (60 min) 2 ×/ day (10 weeks)
Widberg et al.(2009)	48	1	-0.4	0.5	16	BASFI	8	HEP (mobility exercises, stretching and relaxation exercises) (60 min) 2 ×/ day (11 weeks)
Widberg et al.(2009)	48	7	-1	-0.3	16	BASMI	8	HEP (mobility exercises, stretching and relaxation exercises) (60 min) 2 ×/ day (12 weeks)
Widberg et al.(2009)	48	1	0.2	-0.1	16	BASMI	8	control group
I
